# Supplementary material for: An Integration of MicroRNA and Transcriptome Sequencing Analysis Reveal Regulatory Roles of miRNAs in Response to Chilling Stress in Wild Rice
Source: MDPI journal article supplement (doi:10.3390/plants11070977), 2022-04-03
Supplement: s1 [file s1]

Table S1. Statistical analysis of sequencing data.

| Samples     | Raw reads | Length<18 | Length>30 | Clean reads | Q30 <sup>a</sup> (%) |
|-------------|-----------|-----------|-----------|-------------|----------------------|
| 9311-0 h-1  | 26,126861 | 2411375   | 10011067  | 13,704419   | 97.14                |
| 9311-0 h-2  | 29,405783 | 5169800   | 6973103   | 17,262880   | 97.25                |
| 9311-0 h-3  | 19,871273 | 1933486   | 6110022   | 11,827765   | 97.65                |
| 9311-96 h-1 | 22,842008 | 2812559   | 8321291   | 11,708158   | 96.08                |
| 9311-96 h-2 | 23,650069 | 5421798   | 6502108   | 11,726163   | 97.91                |
| 9311-96 h-3 | 22,755398 | 4702726   | 7588022   | 10,464650   | 97.30                |
| DC90-0 h-1  | 24,160870 | 2634669   | 9570465   | 11,955736   | 97.74                |
| DC90-0 h-2  | 20,081098 | 2116326   | 7043589   | 10,921183   | 97.84                |
| DC90-0 h-3  | 21,361852 | 2424128   | 8009649   | 10,928075   | 97.71                |
| DC90-96 h-1 | 21,811625 | 3922384   | 6213888   | 11,675353   | 97.06                |
| DC90-96 h-2 | 20,129922 | 3585454   | 5176247   | 11,368221   | 97.84                |
| DC90-96 h-3 | 21,598987 | 5262119   | 4596198   | 11,740670   | 97.98                |

Notes: The superscript a represents percentage of bases with mass value greater than or equal to 30.
